# Supplementary material for: Risk factors for adverse pregnancy outcomes in Chinese women: a meta-analysis
Source: PeerJ. 2023 Sep 12;11:e15965. doi: 10.7717/peerj.15965 (PMC10503497; doi:10.7717/peerj.15965)
Supplement: Supplemental Information 2 [file peerj-11-15965-s002.xlsx]

## Sheet: BI included in the literature
	First author	Year	Number		Age		BMI		Type of study	Risk factors	NOS
			Expermental	Control	Expermental	Control	Expermental	Control
Prevalence and risk factors of severe postpartum hemorrhage: a retrospective cohort study	Chen-ning Liu	2021	506	32828	187(＞35)	7419(＞35)	111(＞25)	6482(＞25)	retrospective cohort study	2,5,7	7
Effect of site of placentation on pregnancy outcomes in patients with placenta previa	Lin Jing	2018	157	519	32.8±4.2	32.2±3.9			retrospective study	7	8
Association of Ambient air Pollution with risk of preeclampsia during pregnancy: a retrospective cohort study	Lu Jia	2020	2988	113054	8(＞35)	271(＞35)			retrospective cohort study	1,2,3,4,7	7
Efect of types of placenta previa on maternal and neonatal outcomes: a 10‑year retrospective cohort study	Shilei Bi	2021	2651	466	8(＞35)	271(＞35)			retrospective cohort study	1,3,4,5,7	7
Prenatal Exposure to Environmental Tobacco Smoke and Early Development of Children in Rural Guizhou Province, China	Yang He	2018	270	176	24.5 ± 4.	24.7 ± 5.6			cross-sectional study	3,6	7
Polymorphisms in oxidative stress, metabolic detoxification, and immune	Nan Zhao	2021	126	310	49(＞35)	128(＞35)	32(＞25)	74(＞25)	case-control study	2,3,5,6,7	7
Effect of pregravid obesity on perinatal	Lu Liu	2020	444	1033	30	31			retrospective cohort study	2,4,5,6	7
Ambient air pollution exposure during pregnancy and gestational	Hehua Zhang	2020	502	1846	31.6	30.3	23.9	22.2	prospective cohort study	1,3,7	7
Effects of Prepregnancy Body Mass Index, Weight	Wei-juan Su	2019	6982	8874			26.97 ± 1.97	23.82 ± 0.56	retrospective population-based study	2,3,5	7
Correlation between exposure to fine	Xiujuan Su	2020	440	8336	30.4 ± 3.7	30.2 ± 3.6			retrospective study	2	7
Parity and the risks of adverse birth	Li Lin	2021	318424	427986	30.86 ± 4.43	26.46 ± 3.77			retrospective study	3	7
Association between environmental tobacco smoke before and	Xi Chen	2021	464	6038	27.9 ± 3.6	28.3 ± 3.5	20.8 ± 2.8	20.8 ± 2.8	cohort study	2,3,5	8
Effect of flexible patterns of health education on	Jiebing Chen	2019	83	85	28	28			observational Study	2,3,5,6	7
Lifestyle intervention to	Xueyan Lin	2018	139	142	31.4 ±4.9	31.8 ±5.1	25.4±3.4	25.9±3.7	randomized study	1	8
Effects of pre-pregnancy body mass index	Yin Sun	2020	59	2292	8(＞35)	271(＞35)			cohort study	3,7	7

## Sheet: Pregnancy related factors
Age	Expermental＞35		Control＞35		Gravidity	Expermental＞2	Control＞2	Parity	Expermental＞1	Control＞1	Education level	Expermental＞College	Control＞College	Gestational Age (weeks)	Expermental＞37	Control＞37	GDM	Expermental	Control	Smoking	Expermental	Control
	Events	Total	Events	Total		Events	Events		Events	Events		Events	Events		Events	Events		Events	Events		Events	Events
Bi2021	842	2651	118	466		93	6					939	266		953	355		390	75
Chen2019		83		85					31	33		35	45					15	14		8	10
Chen2021		464		6038					87	979		197	3423					51	619
Li2021		318424		427986								76872	190687
Lin2018	0	157	0	519
Lin2018		139		142		50	49
Liu2021	187	506	7419	32828					368	14915								105	5369
Lu2020	515	2988	12159	113054		1899	73052		1575	63575		956	41755		1834	106660
Lu2020		444		1033					245	500					388	944		44	83		105	198
Su2019		6982		8874					4766	5635		4491	6279					2252	2220
Su2020		440		8336					58	1601
Sun2020	8	59	271	2292								1482	27
Yang2018		270		176								28	25								270	176
Zhang2020		502		1846		238	700					255	1013								1	4
Zhao2021	49	126	128	310					43	135		50	157					21	41		28	64
